# Supplementary material for: A neutral mononuclear rhenium(i) complex with a rare in situ-generated triazolyl ligand for the luminescence “turn-on” detection of histidine
Source: Royal Society of Chemistry journal article supplement (doi:10.1039/d2dt03705j), 2022-12-13
Supplement: d2dt03705j1.pdf [file d2dt03705j1.pdf]

## Electronic Supplementary Information (ESI)

### Neutral Mononuclear Rhenium(I) Complex with Rare *in-situ* Generated Triazolyl Ligand for Luminescence “Turn-On” Detection of Histidine

(On the occasion of the 85th birthday anniversary of Retired Senior Professor Chockalingam Srinivasan)

Pounraj Thanasekaran,<sup>a,b</sup> Jui-Hsiang Huang,<sup>c,d</sup> Cing-Rou Jhou,<sup>a</sup> Hsiang-Chun Tsao,<sup>a</sup> Shruti Mendiratta,<sup>d</sup> Cing-Huei Su,<sup>a</sup> Ching-Ping Liu,<sup>\*a</sup> Yen-Hsiang Liu,<sup>\*a</sup> Jui-Hsien Huang<sup>\*c</sup> and Kuang-Lieh Lu<sup>\*a,d</sup>

---

<sup>a</sup>Department of Chemistry, Fu Jen Catholic University  
New Taipei City 242, Taiwan  
E-mail: 129723@mail.fju.edu.tw (C.-P. Liu)  
056461@gapp.fju.edu.tw (Y.-H. Liu)  
kllu@gate.sinica.edu.tw (K.-L. Lu)

<sup>b</sup> Department of Chemistry, Pondicherry University, Puducherry 605 014, India

<sup>c</sup> Department of Chemistry, National Changhua University of Education, Changhua 500, Taiwan  
E-mail: juihuang@cc.ncue.edu.tw (J.-H. Huang)

<sup>d</sup> Institute of Chemistry, Academia Sinica  
Taipei 115, Taiwan

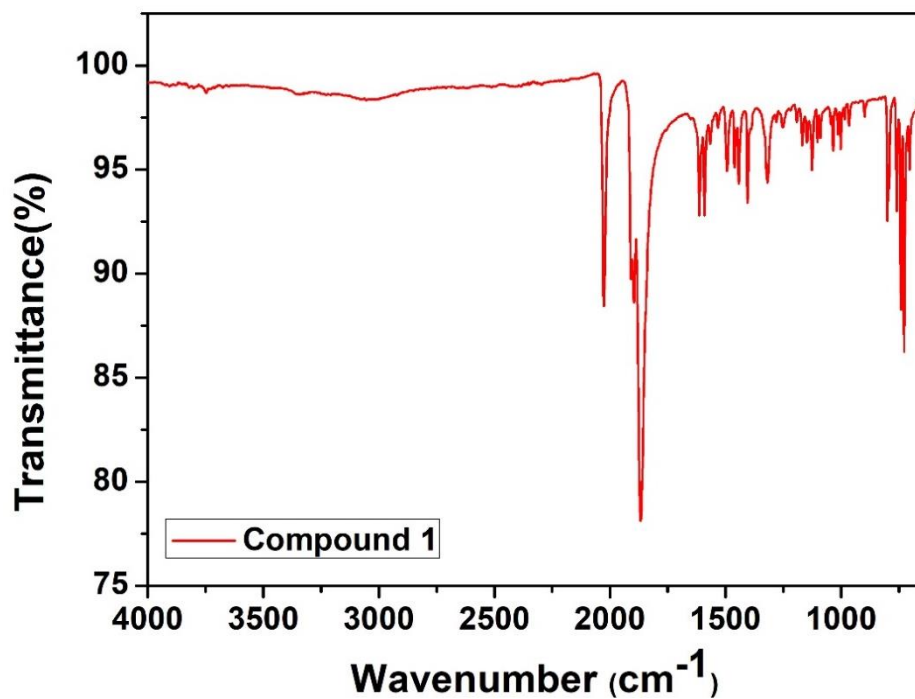

**Fig. S1.** FTIR spectrum of compound 1.

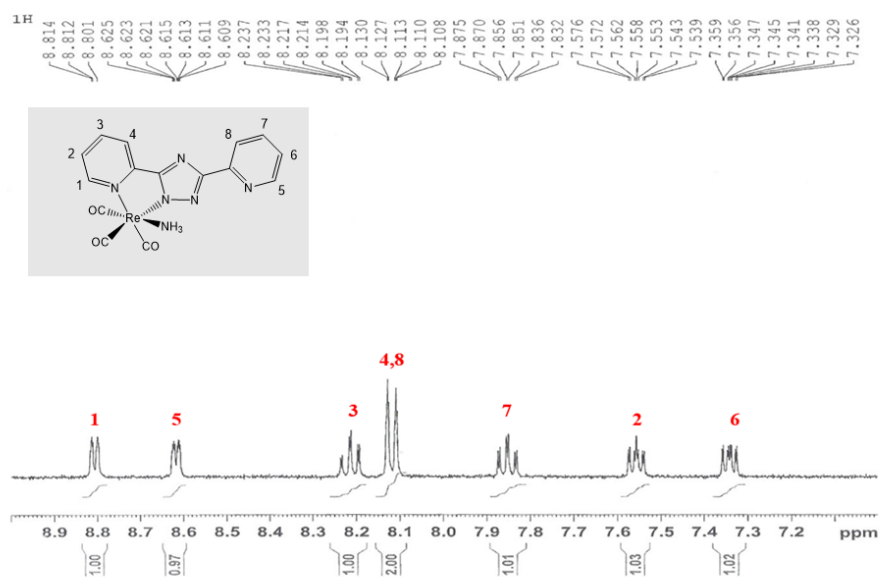

**Fig. S2.** <sup>1</sup>H NMR spectrum of compound 1.

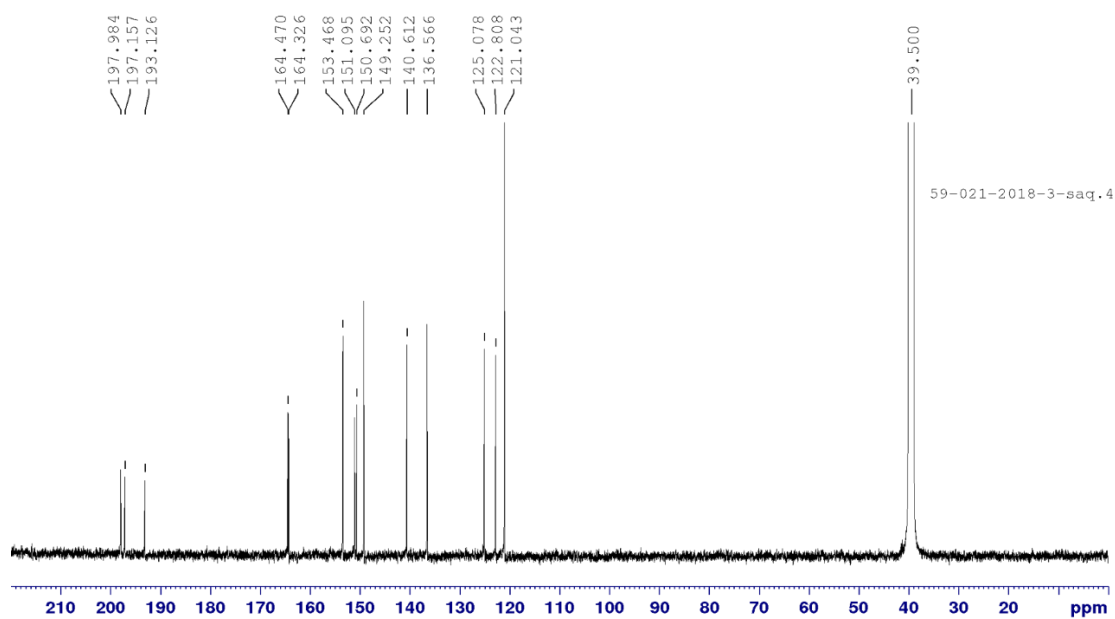

**Fig. S3.**  $^{13}\text{C}$  NMR spectrum of compound **1**.

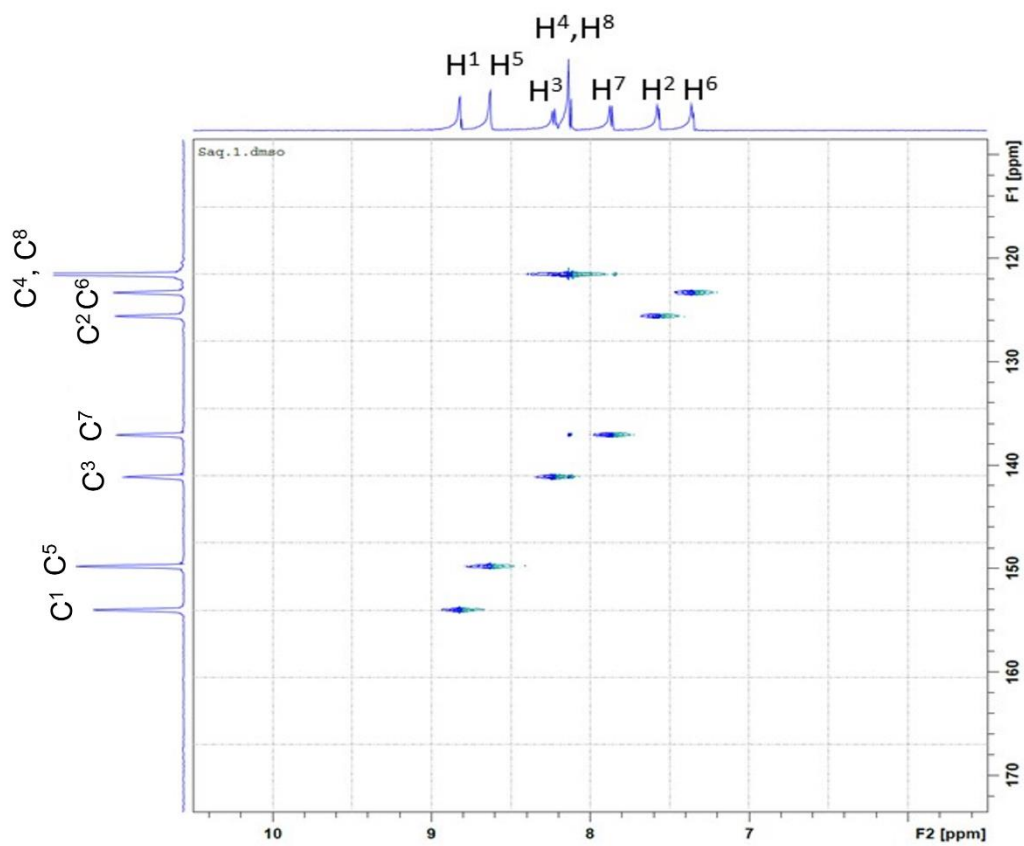

**Fig. S4.**  $^1\text{H}$ - $^{13}\text{C}$ -HSQC 2D NMR spectrum of compound **1**.

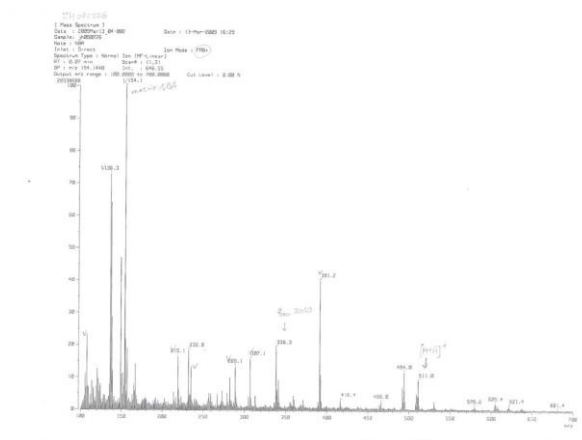

**Fig. S5.** FAB-Mass spectrum of compound **1**.

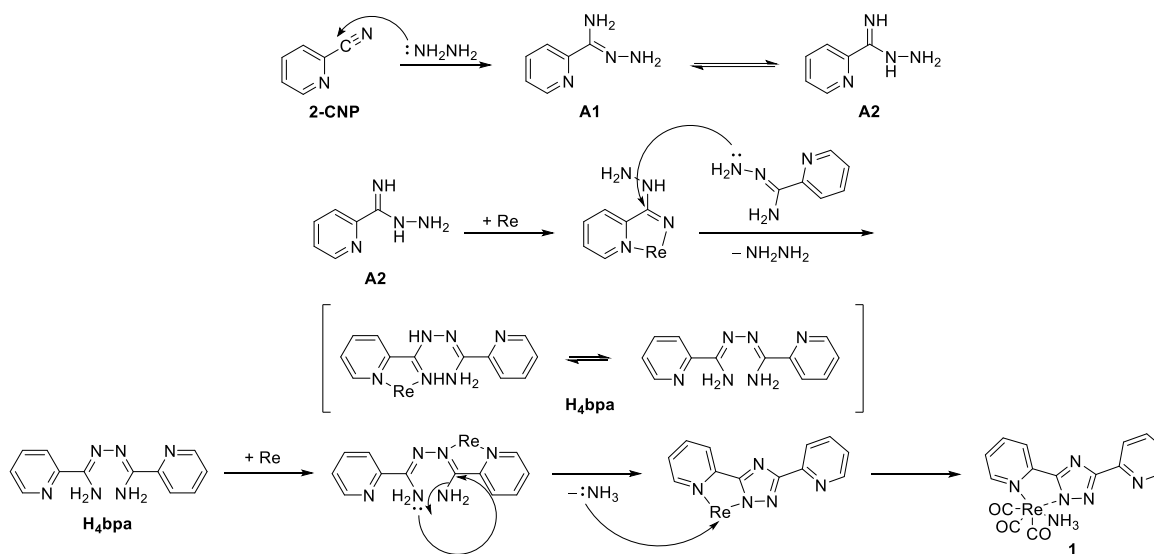

**Scheme S1.** Proposed reaction pathway for the formation of compound **1**, where the 3,5-bis(2-pyridyl)-1,2,4-triazolate (bpt) ligand was *in situ* generated from the reaction of 2-cyanopyridine (2-CNP) and hydrazine.<sup>[1]</sup> The  $\text{NH}_3$  produced in the reaction as a byproduct is trapped in the metal center.  $\text{H}_4\text{bpa} = N,N'$ -bis(picolinamide)azine.

Reference (for Scheme S1)

[1] L. Cheng, W.-X. Zhang, B.-H. Ye, J.-B. Lin, X.-M. Chen, *Inorg. Chem.* 2007, **46**, 1135-1143.

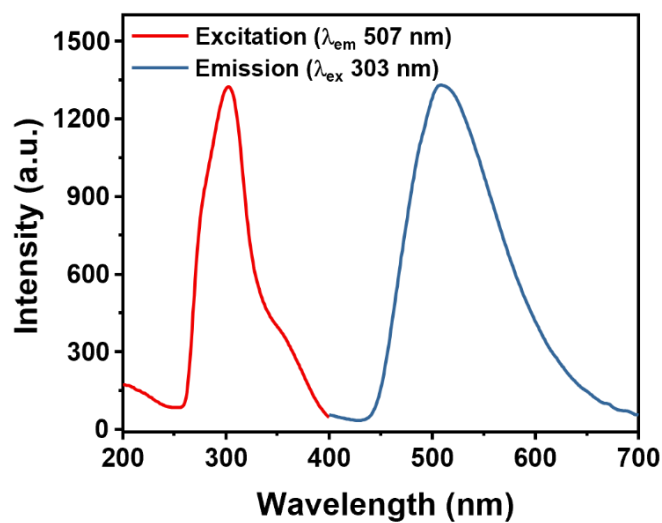

**Fig. S6.** Excitation and emission spectra of the compound **1** in DMF.

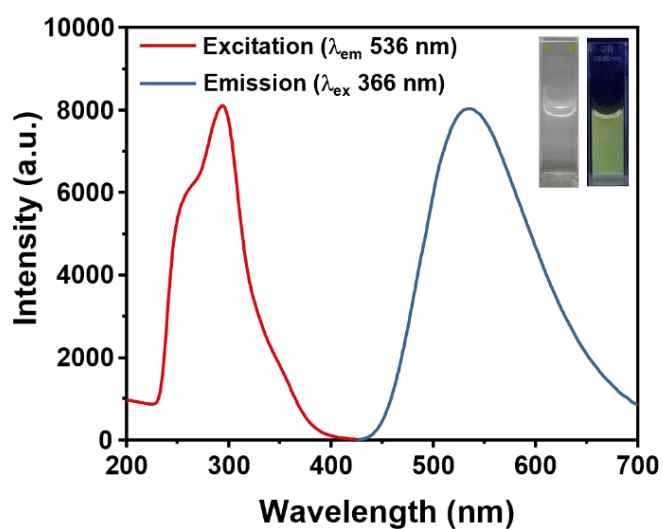

**Fig. S7.** The excitation and emission spectra of compound **1** in Tris-HCl buffer solution.

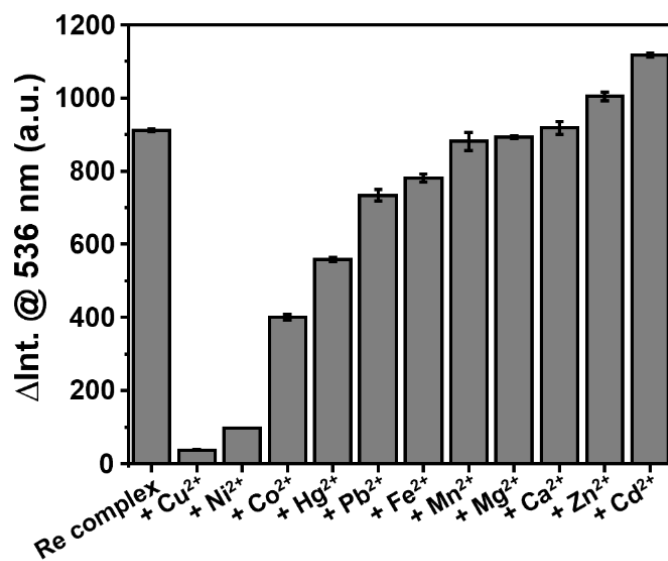

**Fig. S8.** The change in relative emission intensity (at 536 nm) of compound **1** in the presence of various metal ions with equivalent concentration (250  $\mu\text{M}$ ).

**Table S1.**  $K_{\text{SV}}$  values at different temperatures.

| T (K)  | Linear equation <sup>a</sup>                   | $K_{\text{SV}}$ ( $\mu\text{M}^{-1}$ ) |
|--------|------------------------------------------------|----------------------------------------|
| 293.15 | $(F_0/F) = 0.0372 \times [\text{Ni}^{2+}] + 1$ | 0.0372                                 |
| 303.15 | $(F_0/F) = 0.0285 \times [\text{Ni}^{2+}] + 1$ | 0.0285                                 |
| 313.15 | $(F_0/F) = 0.0223 \times [\text{Ni}^{2+}] + 1$ | 0.0223                                 |

<sup>a</sup> $[\text{Ni}^{2+}]$  in  $\mu\text{M}$ .

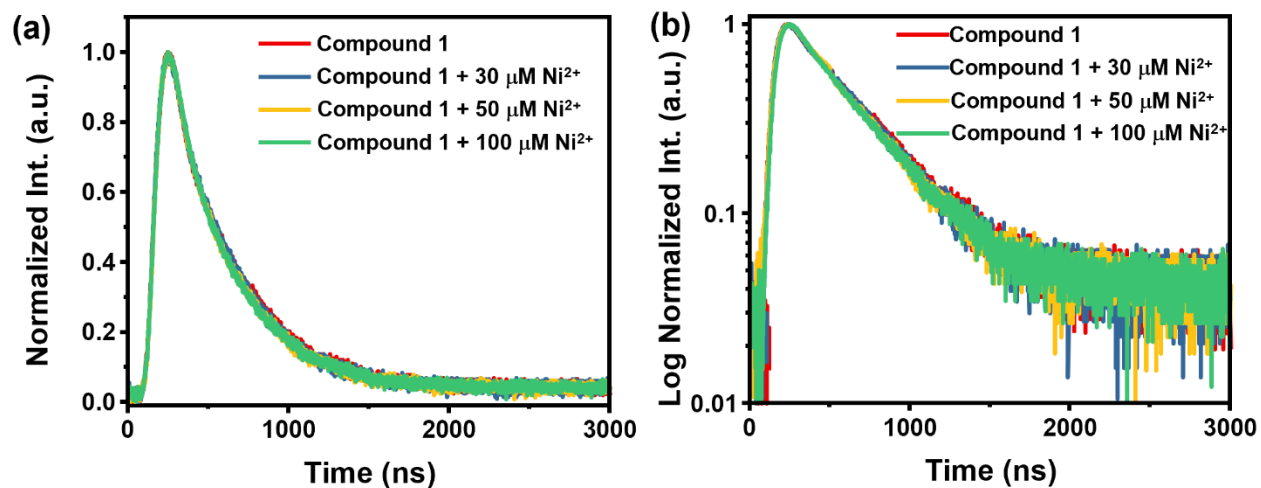

**Fig. S9.** Time-resolved luminescence decay (a) and the corresponding profiles with the logarithmic scale (b) of compound **1** in the absence and presence of  $\text{Ni}^{2+}$ .

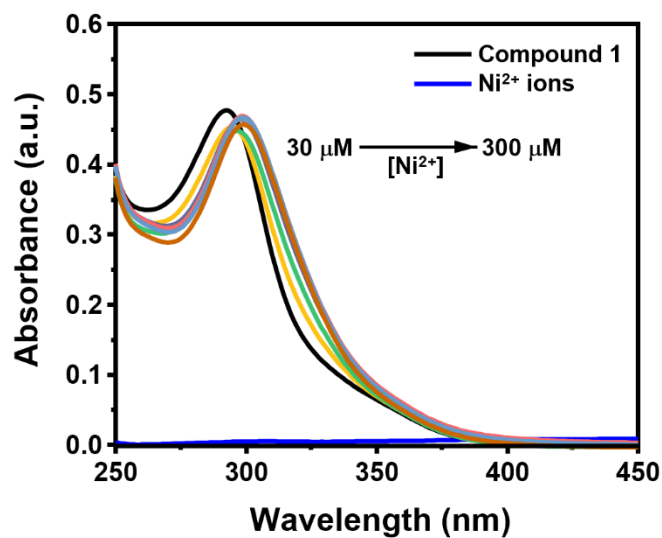

**Fig. S10.** The UV-vis absorption spectra of compound **1** in the absence and presence of  $\text{Ni}^{2+}$ .

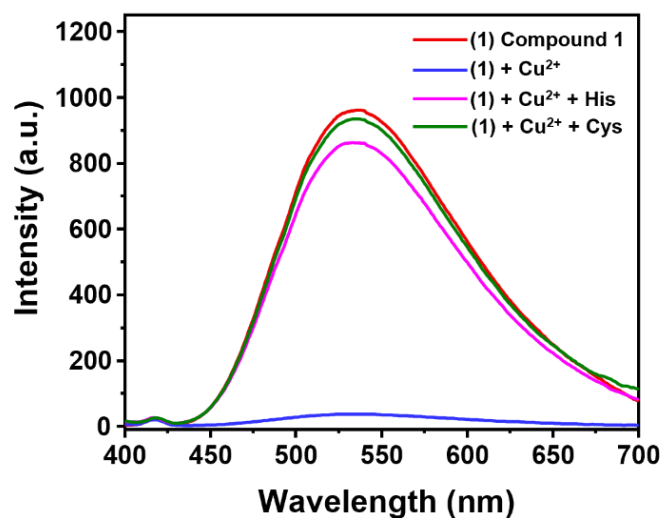

**Fig. S11.** The emission spectra of compound **1**. Compound **1** mixed with  $\text{Cu}^{2+}$  followed by the addition of either histidine or cysteine, respectively.

**Table S1.** Comparison of methods using other compounds or nanomaterials for the detection of histidine with that for compound **1**.

| Compound or nanomaterials              | Linear range<br>( $\mu\text{M}$ ) | LOD<br>( $\mu\text{M}$ ) | Reference* |
|----------------------------------------|-----------------------------------|--------------------------|------------|
| DNA-scaffolded Ag nanoclusters         | 0–100                             | 1.4                      | 12b        |
| ds-DNA-templated Cu nanoclusters       | 0.2–100                           | 0.02                     | 12c        |
| IF@SiQDs                               | 2800–5000                         | 2200                     | 12d        |
| BSA-AuNCs                              | 0.1–26                            | 0.03                     | 12e        |
| ZnS QDs                                | 1.25–30                           | 0.74                     | 12f        |
| CdTe QDs                               | 1–30                              | 0.3                      | 12g        |
| Dumbbell DNA-templated Cu nanoclusters | 0.05–40                           | 0.0016                   | 12h        |
| SSA/AMP-Tb                             | 0.2–150                           | 0.07                     | 12i        |
| Ru-PDA                                 | 18–143                            | 1.4                      | 12j        |
| Re complex                             | 200–2000                          | 1.2                      | This work  |

\*As referred in main text.



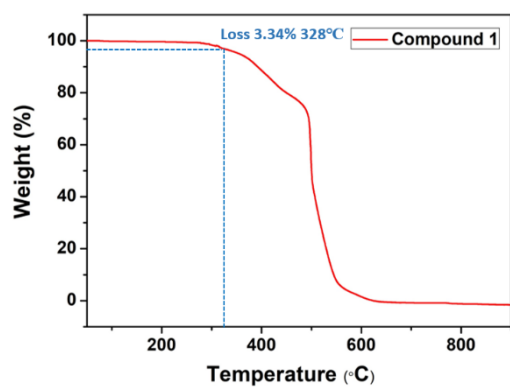

(a)

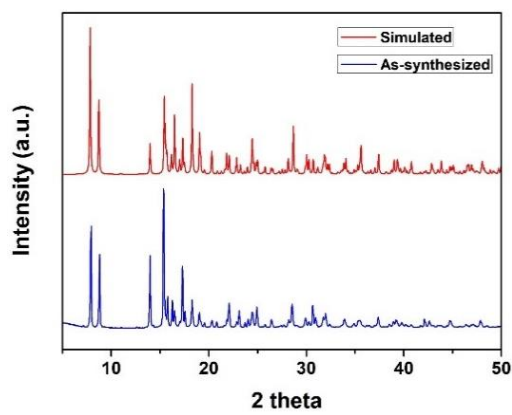

(b)

**Fig. S12.** (a) Thermogravimetric plot and (b) powder X-ray diffraction patterns of compound **1**.

## Crystallographic information

**Table S2.** Crystal data and structure refinement for compound **1**.

|                                              |                                                                  |                     |
|----------------------------------------------|------------------------------------------------------------------|---------------------|
| Identification code                          | <b>1</b>                                                         |                     |
| Empirical formula                            | C <sub>15</sub> H <sub>11</sub> N <sub>6</sub> O <sub>3</sub> Re |                     |
| Formula weight                               | 509.50                                                           |                     |
| Temperature                                  | 200(2) K                                                         |                     |
| Wavelength                                   | 0.71073 Å                                                        |                     |
| Crystal system                               | Orthorhombic                                                     |                     |
| Space group                                  | <i>Pbca</i>                                                      |                     |
| Unit cell dimensions                         | <i>a</i> = 6.07770(10) Å                                         | $\alpha = 90^\circ$ |
|                                              | <i>b</i> = 22.5621(5) Å                                          | $\beta = 90^\circ$  |
|                                              | <i>c</i> = 22.9459(6) Å                                          | $\gamma = 90^\circ$ |
| Volume                                       | 3146.47(12) Å <sup>3</sup>                                       |                     |
| <i>Z</i>                                     | 8                                                                |                     |
| Density (calculated)                         | 2.151 Mg/m <sup>3</sup>                                          |                     |
| Absorption coefficient                       | 7.753 mm <sup>-1</sup>                                           |                     |
| <i>F</i> (000)                               | 1936                                                             |                     |
| Crystal size                                 | 0.34 x 0.20 x 0.06 mm <sup>3</sup>                               |                     |
| Theta range for data collection              | 2.53 to 25.13°                                                   |                     |
| Index ranges                                 | -7<= <i>h</i> <=7, -26<= <i>k</i> <=26, -27<= <i>l</i> <=25      |                     |
| Reflections collected                        | 13787                                                            |                     |
| Independent reflections                      | 2779 [R(int) = 0.0316]                                           |                     |
| Completeness to theta = 25.13°               | 98.9 %                                                           |                     |
| Absorption correction                        | multi-scan                                                       |                     |
| Max. and min. transmission                   | 0.6534 and 0.1780                                                |                     |
| Refinement method                            | Full-matrix least-squares on <i>F</i> <sup>2</sup>               |                     |
| Data / restraints / parameters               | 2779 / 0 / 227                                                   |                     |
| Goodness-of-fit on <i>F</i> <sup>2</sup>     | 1.071                                                            |                     |
| Final R indices [ <i>I</i> > 2σ( <i>I</i> )] | R1 = 0.0193, wR2 = 0.0428                                        |                     |
| R indices (all data)                         | R1 = 0.0219, wR2 = 0.0440                                        |                     |
| Largest diff. peak and hole                  | 0.486 and -0.693 e.Å <sup>-3</sup>                               |                     |

---
